# Supplementary material for: Quantitative Models of Phage-Antibiotic Combination Therapy
Source: PubMed Central journal article supplement (PMC7002117; doi:10.1128/msystems.00756-19), 2020-02-04

Combined therapy + Immune response against  $B_p$  inoculum

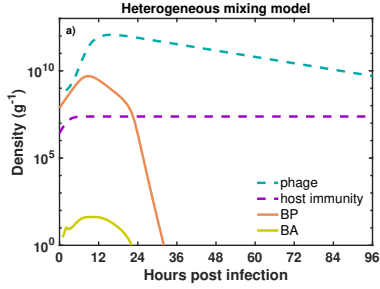

Combined therapy + Immune response against  $B_p$  inoculum

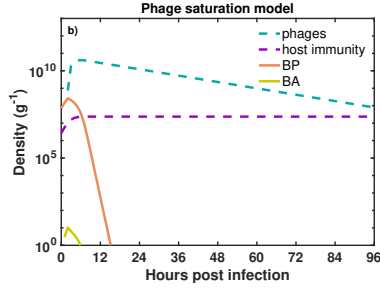

Combined therapy + Immune response against  $B_p$  inoculum

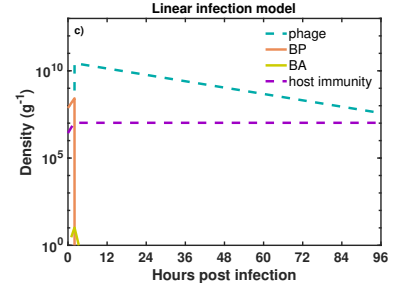

Combined therapy + Immune response against  $B_A$  inoculum

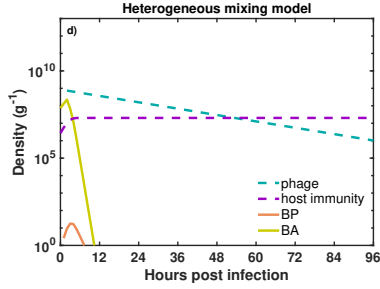

Combined therapy + Immune response against  $B_A$  inoculum

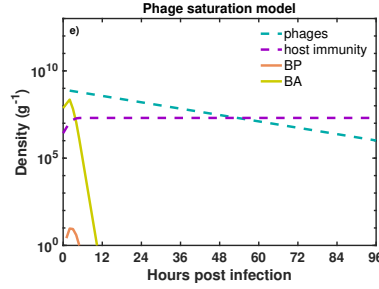

Combined therapy + Immune response against  $B_A$  inoculum

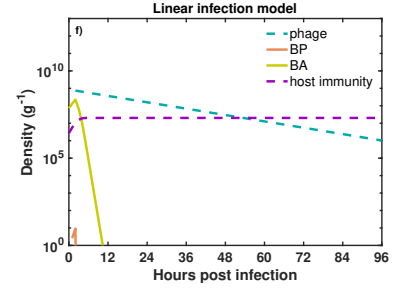

Supplement: mSystems.00756-19-sf001.pdf [file mSystems.00756-19-sf001.pdf]
