# Supplementary material for: Quantitative Models of Phage-Antibiotic Combination Therapy
Source: PubMed Central journal article supplement (PMC7002117; doi:10.1128/msystems.00756-19), 2020-02-04

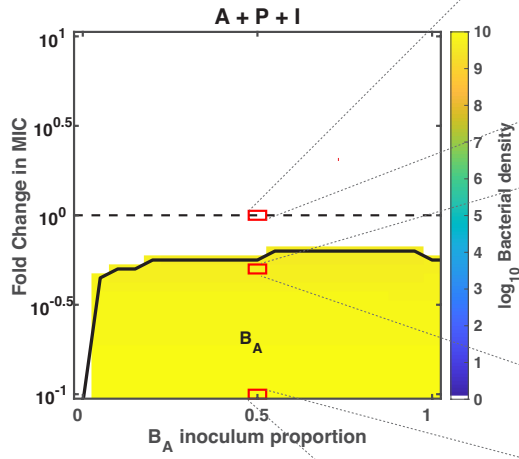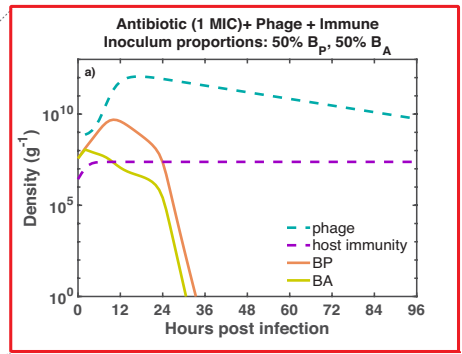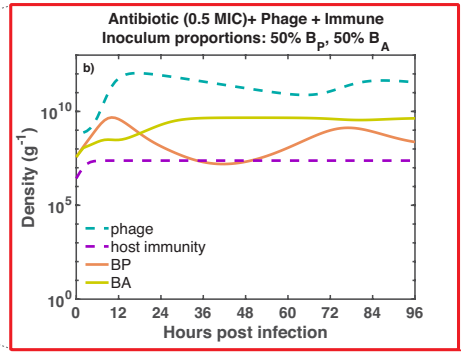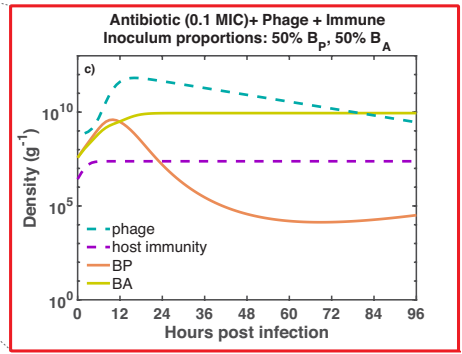

Supplement: mSystems.00756-19-sf003.pdf [file mSystems.00756-19-sf003.pdf]
